# Supplementary material for: Preservation of Metabolic Flexibility in Skeletal Muscle by a Combined Use of n-3 PUFA and Rosiglitazone in Dietary Obese Mice
Source: PLoS One. 2012 Aug 31;7(8):e43764. doi: 10.1371/journal.pone.0043764 (PMC3432031; doi:10.1371/journal.pone.0043764)
Supplement: Table S1 — List of all 163 metabolites measured in skeletal muscle extracts - targeted metabolomics analysis. In short, 14 amino acids, sum of hexoses (H1), free carnitine (C0), 26 acylcarnitines (C2, C3,…C18∶2), 14 hydroxy- and dicarboxy-acylcarnitines (C-3OH, C4-OH, C5-DC,…C18∶1-OH), 10 sphingomyelins (SM C16∶0, SM C16∶1,… SM C26∶1), 5 hydroxysphingomyelins [SM(OH)C14∶1… SM(OH)C24∶1], 38 diacyl-phosphatidylcholines (PC aa C24∶0 …PC aa C42∶6), 39 acyl-alkyl-phospatidylcholines (PC ae C30∶0… PC ae C44∶6), and 15 lyso-phosphatidylcholines (lysoPC a C6∶0….lysoPC a C28∶1) were identified in extracts of skeletal muscle from animals subjected to various interventions and killed when re-fed Chow (see Methods and Fig. 1). Concentrations of all analysed metabolites are reported in µM. All metabolites above were determined using flow injection analysis/thermospray mass spectrometry (FIA-MS) with Biocrates AbsoluteIDQ™ targeted metabolomics technology. Data are means±SE (n = 7–8). (XLS) [file pone.0043764.s002.xls]

## Sheet: Table S1
Table S1
List of all 163 metabolites measured in skeletal muscle extracts - targeted metabolomics analysis.
Carnitines (Acylcarnitines)
			cHF	cHF+F	cHF+ROSI	cHF+F+ROSI
Abbreviation	Order	Full biochemical name	means ± SE	means ± SE	means ± SE	means ± SE
C0	1	Carnitine	57.76 ± 5.151	60.60 ± 2.002	49.76 ± 2.971	53.27 ± 2.081
C10	2	Decanoylcarnitine	0.100 ± 0.007	0.070 ± 0.005	0.094 ± 0.008	0.082 ± 0.006
C10:1	3	Decenoylcarnitine	0.071 ± 0.005	0.064 ± 0.004	0.067 ± 0.003	0.071 ± 0.005
C10:2	4	Decadienylcarnitine	0.017 ± 0.001	0.020 ± 0.002	0.018 ± 0.002	0.021 ± 0.001
C12	5	Dodecanoylcarnitine	0.137 ± 0.011	0.074 ± 0.008	0.134 ± 0.011	0.092 ± 0.008
C12-DC	6	Dodecenoylcarnitine	0.080 ± 0.001	0.078 ± 0.001	0.077 ± 0.002	0.077 ± 0.002
C12:1	7	Dodecanedioylcarnitine	0.078 ± 0.005	0.071 ± 0.005	0.079 ± 0.004	0.077 ± 0.004
C14	8	Tetradecanoylcarnitine	0.412 ± 0.041	0.170 ± 0.0024	0.390 ± 0.043	0.220 ± 0.028
C14:1	9	Tetradecenoylcarnitine	0.086 ± 0.009	0.038 ± 0.01	0.083 ± 0.011	0.055 ± 0.006
C14:1-OH	10	Hydroxytetradecenoylcarnitine	0.031 ± 0.003	0.018 ± 0.002	0.032 ± 0.004	0.020 ± 0.002
C14:2	11	Tetradecadienylcarnitine	0.030 ± 0.004	0.016 ± 0.002	0.022 ± 0.004	0.022 ± 0.002
C14:2-OH	12	Hydroxytetradecadienylcarnitine	0.011 ± 0.001	0.008 ± 0.001	0.010 ± 0.001	0.010 ± 0.000
C16	13	Hexadecanoylcarnitine	1.821 ± 0.247	0.873 ± 0.091	1.904 ± 0.318	1.018 ± 0.109
C16-OH	14	Hydroxyhexadecanoylcarnitine	0.064 ± 0.012	0.027 ± 0.005	0.055 ± 0.007	0.037 ± 0.003
C16:1	15	Hexadecenoylcarnitine	0.252 ± 0.026	0.113 ± 0.010	0.243 ± 0.047	0.144 ± 0.015
C16:1-OH	16	Hydroxyhexadecenoylcarnitine	0.042 ± 0.005	0.022 ± 0.003	0.039 ± 0.006	0.029 ± 0.003
C16:2	17	Hexadecadienylcarnitine	0.076 ± 0.009	0.037 ± 0.007	0.057 ± 0.013	0.052 ± 0.007
C16:2-OH	18	Hydroxyhexadecadienylcarnitine	0.018 ± 0.002	0.012 ± 0.001	0.017 ± 0.002	0.016 ± 0.001
C18	19	Octadecanoylcarnitine	0.294 ± 0.047	0.187 ± 0.030	0.233 ± 0.034	0.195 ± 0.021
C18:1	20	Octadecenoylcarnitine	0.946 ± 0.104	0.468 ± 0.041	0.778 ± 0.140	0.532 ± 0.047
C18:1-OH	21	Hydroxyoctadecenoylcarnitine	0.053 ± 0.009	0.027 ± 0.003	0.044 ± 0.006	0.035 ± 0.003
C18:2	22	Octadecadienylcarnitine	0.631 ± 0.065	0.328 ± 0.043	0.510 ± 0.104	0.404 ± 0.036
C2	23	Acetylcarnitine	16.36 ± 1.545	13.10 ± 1.072	12.49 ± 1.159	12.74 ± 0.535
C3	24	Propionylcarnitine	0.159 ± 0.012	0.105 ± 0.017	0.125 ± 0.019	0.105 ± 0.010
C4-OH (C3-DC)	25	Hydroxybutyrylcarnitine (Malonylcarnitine)	0.170 ± 0.052	0.067 ± 0.011	0.082 ± 0.009	0.084 ± 0.008
C3-OH	26	Hydroxypropionylcarnitine	0.065 ± 0.003	0.069 ± 0.003	0.071 ± 0.004	0.067 ± 0.002
C3:1	27	Propenoylcarnitine	0.016 ± 0.002	0.015 ± 0.001	0.015 ± 0.001	0.013 ± 0.001
C4	28	Butyrylcarnitine	0.340 ± 0.072	0.177 ± 0.028	0.219 ± 0.021	0.199 ± 0.023
C4:1	29	Butenylcarnitine	0.011 ± 0.002	0.011 ± 0.001	0.010 ± 0.000	0.012 ± 0.001
C5	30	Valerylcarnitine	0.093 ± 0.007	0.061 ± 0.004	0.084 ± 0.012	0.064 ± 0.005
C5-DC (C6-OH)	31	Glutarylcarnitine (Hydroxyhexanoylcarnitine)	0.026 ± 0.003	0.017 ± 0.001	0.025 ± 0.002	0.018 ± 0.001
C5-M-DC	32	Methylglutarylcarnitine	0.016 ± 0.001	0.018 ± 0.001	0.017 ± 0.001	0.018 ± 0.002
C5-OH (C3-DC-M)	33	Hydroxyvalerylcarnitine (Methylmalonylcarnitine)	0.191 ± 0.009	0.190 ± 0.009	0.157 ± 0.007	0.185 ± 0.004
C5:1	34	Tiglylcarnitine	0.024 ± 0.002	0.024 ± 0.002	0.023 ± 0.001	0.022 ± 0.001
C5:1-DC	35	Glutaconylcarnitine	0.009 ± 0.001	0.008 ± 0.001	0.009 ± 0.000	0.008 ± 0.001
C6 (C4:1-DC)	36	Hexanoylcarnitine (Fumarylcarnitine)	0.122 ± 0.011	0.076 ± 0.011	0.103 ± 0.007	0.095 ± 0.010
C6:1	37	Hexenoylcarnitine	0.012 ± 0.001	0.012 ± 0.001	0.012 ± 0.001	0.012 ± 0.001
C7-DC	38	Pimelylcarnitine	0.024 ± 0.002	0.019 ± 0.001	0.023 ± 0.001	0.021 ± 0.001
C8	39	Octanoylcarnitine	0.122 ± 0.008	0.090 ± 0.005	0.113 ± 0.005	0.099 ± 0.005
C8:1	40	Octenoylcarnitine	0.012 ± 0.001	0.011 ± 0.001	0.012 ± 0.001	0.014 ± 0.001
C9	41	Nonaylcarnitine	0.014 ± 0.001	0.014 ± 0.001	0.014 ± 0.001	0.013 ± 0.001
Amino Acids
			cHF	cHF+F	cHF+ROSI	cHF+F+ROSI
Abbreviation		Full biochemical name	means ± SE	means ± SE	means ± SE	means ± SE
Arg	42	Arginine	20.79 ± 1.11	15.40 ± 0.54	21.94 ± 1.86	15.93 ± 1.28
Gln	43	Glutamine	373.6 ± 17.24	310.6 ± 11.55	375.13 ± 21.24	347.86 ± 20.55
Gly	44	Glycine	405.9 ± 18.81	255.5 ± 8.63	331.5 ± 16.34	226.29 ± 14.21
His	45	Histidine	31.95 ± 2.07	27.83 ± 1.14	32.04 ± 1.79	29.94 ± 2.01
Met	46	Methionine	22.98 ± 0.96	19.57 ± 0.88	19.05 ± 1.23	17.69 ± 0.78
Orn	47	Ornithine	6.37 ± 0.72	4.77 ± 0.34	5.42 ± 0.45	5.27 ± 0.41
Phe	48	Phenylalanine	15.76 ± 0.75	14.01 ± 0.43	14.29 ± 0.76	13.77 ± 0.68
Pro	49	Proline	53.51 ± 2.00	39.64 ± 1.25	48.41 ± 2.88	37.49 ± 1.17
Ser	50	Serine	43.23 ± 3.42	36.03 ± 1.42	42.69 ± 2.16	33.29 ± 2.51
Thr	51	Threonine	39.14 ± 3.39	30.51 ± 1.50	35.01 ± 2.10	26.69 ± 2.32
Trp	52	Tryptophan	8.242 ± 0.25	7.191 ± 0.15	7.851 ± 0.39	7.56 ± 0.18
Tyr	53	Tyrosine	31.03 ± 2.06	28.10 ± 1.62	27.89 ± 2.20	26.27 ± 1.74
Val	54	Valine	50.25 ± 1.77	42.96 ± 2.02	48.31 ± 2.99	45.67 ± 3.83
xLeu	55	Leucine / Isoleucine	63.74± 3.10	54.86 ± 3.60	65.13 ± 5.44	55.20 ± 2.85
Glycerophospholipids
			cHF	cHF+F	cHF+ROSI	cHF+F+ROSI
Abbreviation		Full biochemical name	means ± SE	means ± SE	means ± SE	means ± SE
PC aa C24:0	56	Phosphatidylcholine diacyl C24:0	0.055 ± 0.002	0.055 ± 0.006	0.058 ± 0.002	0.055 ± 0.003
PC aa C26:0	57	Phosphatidylcholine diacyl C26:0	0.515 ± 0.004	0.495 ± 0.012	0.516 ± 0.07	0.492 ± 0.008
PC aa C28:1	58	Phosphatidylcholine diacyl C28:1	0.118 ± 0.003	0.111 ± 0.007	0.128 ± 0.006	0.44 ± 0.008
PC aa C30:0	59	Phosphatidylcholine diacyl C30:0	7.445 ± 0.507	5.619 ± 0.388	8.150 ± 0.500	6.209 ± 0.684
PC aa C30:2	60	Phosphatidylcholine diacyl C30:2	0.235 ± 0.007	0.106 ± 0.008	0.283 ± 0.014	0.112 ± 0.011
PC aa C32:0	61	Phosphatidylcholine diacyl C32:0	10.22 ± 1.117	13.44 ± 0.947	10.42 ± 0.814	16.84 ± 2.658
PC aa C32:1	62	Phosphatidylcholine diacyl C32:1	19.04 ± 1.100	7.907 ± 0.560	22.52 ± 1.599	9.044 ± 0.938
PC aa C32:2	63	Phosphatidylcholine diacyl C32:2	7.013 ± 0.381	2.293 ± 0.124	8.011 ± 0.429	2.466 ± 0.232
PC aa C32:3	64	Phosphatidylcholine diacyl C32:3	0.941 ± 0.036	0.325 ± 0.015	1.236 ± 0.056	0.368± 0.023
PC aa C34:1	65	Phosphatidylcholine diacyl C34:1	34.64 ± 2.882	22.23 ± 1.958	39.26 ± 3.795	28.10 ± 4.859
PC aa C34:2	66	Phosphatidylcholine diacyl C34:2	105.0 ± 7.411	30.72 ± 2.98	110.6 ± 7.117	33.62 ± 4.147
PC aa C34:3	67	Phosphatidylcholine diacyl C34:3	10.203 ± 0.686	2.883 ± 0.161	11.50 ± 0.718	3.261 ± 0.293
PC aa C34:4	68	Phosphatidylcholine diacyl C34:4	3.668 ± 0.179	0.726 ± 0.040	4.704 ± 0.230	0.754 ± 0.058
PC aa C36:0	69	Phosphatidylcholine diacyl C36:0	4.283 ± 0.232	7.220 ± 0.650	3.780 ± 0.306	8.023 ± 0.058
PC aa C36:1	70	Phosphatidylcholine diacyl C36:1	2.678 ± 0.315	2.014 ± 0.290	2.920 ± 0.388	2.839 ± 0.647
PC aa C36:2	71	Phosphatidylcholine diacyl C36:2	23.375 ± 2.090	7.480 ± 0.803	24.70 ± 2.530	8.747 ± 1.423
PC aa C36:3	72	Phosphatidylcholine diacyl C36:3	26.738 ± 2.185	6.139 ± 0.481	34.04 ± 2.90	7.046 ± 0.885
PC aa C36:4	73	Phosphatidylcholine diacyl C36:4	106.325 ± 5.355	18.157 ± 1.483	127.4 ± 6.471	17.93 ± 1.840
PC aa C36:5	74	Phosphatidylcholine diacyl C36:5	6.936 ± 0.382	5.036 ± 0.372	9.200 ± 0.529	5.729 ± 0.588
PC aa C36:6	75	Phosphatidylcholine diacyl C36:6	6.090 ± 0.369	16.33 ± 1.187	4.790 ± 0.206	17.94 ± 1.624
PC aa C38:0	76	Phosphatidylcholine diacyl C38:0	1.017 ± 0.062	2.769 ± 0.206	0.848 ± 0.067	3.197 ± 0.439
PC aa C38:1	77	Phosphatidylcholine diacyl C38:1	0.469 ± 0.036	1.247 ± 0.115	0.418 ± 0.036	1.454 ± 0.220
PC aa C38:3	78	Phosphatidylcholine diacyl C38:3	1.784 ± 0.156	0.905 ± 0.113	2.216 ± 0.266	1.135 ± 0.214
PC aa C38:4	79	Phosphatidylcholine diacyl C38:4	16.700 ± 1.076	1.226 ± 0.084	21.79 ± 2.305	1.095 ± 0.128
PC aa C38:5	80	Phosphatidylcholine diacyl C38:5	43.18 ± 3.104	36.12 ± 4.288	54.18 ± 4.171	42.49 ± 7.620
PC aa C38:6	81	Phosphatidylcholine diacyl C38:6	140.6 ± 4.367	206.9 ± 4.913	120.3 ± 5.716	231.7 ± 4.999
PC aa C40:1	82	Phosphatidylcholine diacyl C40:1	0.196 ± 0.015	0.266 ± 0.025	0.202 ± 0.015	0.343 ± 0.055
PC aa C40:2	83	Phosphatidylcholine diacyl C40:2	0.057 ± 0.006	0.069 ± 0.008	0.062 ± 0.007	0.101 ± 0.019
PC aa C40:3	84	Phosphatidylcholine diacyl C40:3	0.062 ± 0.004	0.060 ± 0.007	0.071 ± 0.006	0.079 ± 0.014
PC aa C40:4	85	Phosphatidylcholine diacyl C40:4	0.732 ± 0.059	0.345 ± 0.025	0.945 ± 0.127	0.397 ± 0.039
PC aa C40:5	86	Phosphatidylcholine diacyl C40:5	3.221 ± 0.276	1.927 ± 0.256	4.034 ± 0.485	2.554 ± 0.574
PC aa C40:6	87	Phosphatidylcholine diacyl C40:6	19.24 ± 1.414	38.00 ± 4.054	14.44 ± 1.313	46.54 ± 8.737
PC aa C42:0	88	Phosphatidylcholine diacyl C42:0	0.020 ± 0.001	0.036 ± 0.004	0.019 ± 0.001	0.043 ± 0.006
PC aa C42:1	89	Phosphatidylcholine diacyl C42:1	0.062 ± 0.013	0.146 ± 0.022	0.075 ± 0.012	0.220 ± 0.064
PC aa C42:2	90	Phosphatidylcholine diacyl C42:2	0.048 ± 0.008	0.095 ± 0.015	0.051 ± 0.006	0.140 ± 0.027
PC aa C42:4	91	Phosphatidylcholine diacyl C42:4	0.046 ± 0.004	0.169 ± 0.015	0.046 ± 0.005	0.224 ± 0.039
PC aa C42:5	92	Phosphatidylcholine diacyl C42:5	0.078 ± 0.02	0.075 ± 0.006	0.090 ± 0.012	0.090 ± 0.012
PC aa C42:6	93	Phosphatidylcholine diacyl C42:6	0.413 ± 0.017	0.497 ± 0.030	0.405 ± 0.020	0.592 ± 0.096
PC ae C30:0	94	Phosphatidylcholine acyl-alkyl C30:0	0.297 ± 0.017	0.198 ± 0.012	0.355 ± 0.014	0.227 ± 0.016
PC ae C30:1	95	Phosphatidylcholine acyl-alkyl C30:1	0.107 ± 0.009	0.051 ± 0.002	0.132 ± 0.010	0.060 ± 0.008
PC ae C30:2	96	Phosphatidylcholine acyl-alkyl C30:2	0.091 ± 0.003	0.089 ± 0.003	0.088 ± 0.002	0.087 ± 0.003
PC ae C32:1	97	Phosphatidylcholine acyl-alkyl C32:1	0.911 ± 0.068	0.453 ± 0.032	1.153 ± 0.082	0.531 ± 0.068
PC ae C32:2	98	Phosphatidylcholine acyl-alkyl C32:2	0.226 ± 0.010	0.152 ± 0.011	0.275 ± 0.018	0.168 ± 0.014
PC ae C34:0	99	Phosphatidylcholine acyl-alkyl C34:0	0.369 ± 0.039	0.331 ± 0.031	0.431 ± 0.036	0.426 ± 0.074
PC ae C34:1	100	Phosphatidylcholine acyl-alkyl C34:1	2.351 ± 0.178	1.447 ± 0.128	2.830 ± 0.241	1.733 ± 0.277
PC ae C34:2	101	Phosphatidylcholine acyl-alkyl C34:2	1.886 ± 0.133	0.855 ± 0.069	2.140 ± 0.149	0.935 ± 0.110
PC ae C34:3	102	Phosphatidylcholine acyl-alkyl C34:3	0.853 ± 0.060	0.418 ± 0.036	0.890 ± 0.071	0.417 ± 0.047
PC ae C36:0	103	Phosphatidylcholine acyl-alkyl C36:0	0.175 ± 0.009	0.282 ± 0.022	0.191 ± 0.008	0.316 ± 0.029
PC ae C36:1	104	Phosphatidylcholine acyl-alkyl C36:1	0.670 ± 0.055	0.522 ± 0.056	0.782 ± 0.070	0.669 ± 0.126
PC ae C36:2	105	Phosphatidylcholine acyl-alkyl C36:2	1.509 ± 0.121	0.611 ± 0.053	1.629 ± 0.143	0.720 ± 0.119
PC ae C36:3	106	Phosphatidylcholine acyl-alkyl C36:3	0.701 ± 0.049	0.275 ± 0.024	0.793 ± 0.057	0.324 ± 0.046
PC ae C36:4	107	Phosphatidylcholine acyl-alkyl C36:4	1.355 ± 0.072	0.369 ± 0.030	1.688 ± 0.106	0.374 ± 0.039
PC ae C36:5	108	Phosphatidylcholine acyl-alkyl C36:5	1.198 ± 0.082	0.628 ± 0.051	1.451 ± 0.120	0.660 ± 0.070
PC ae C38:0	109	Phosphatidylcholine acyl-alkyl C38:0	8.810± 0.269	15.89 ± 0.871	7.735 ± 0.437	18.529 ± 1.435
PC ae C38:1	110	Phosphatidylcholine acyl-alkyl C38:1	0.624 ± 0.019	1.356 ± 0.057	0.480 ± 0.028	1.544 ± 0.099
PC ae C38:2	111	Phosphatidylcholine acyl-alkyl C38:2	0.305 ± 0.019	0.299 ± 0.026	0.358 ± 0.038	0.398 ± 0.067
PC ae C38:3	112	Phosphatidylcholine acyl-alkyl C38:3	0.261 ± 0.012	1.157 ± 0.014	0.344 ± 0.024	0.200 ± 0.022
PC ae C38:4	113	Phosphatidylcholine acyl-alkyl C38:4	1.416 ± 0.095	0.377 ± 0.033	1.836 ± 0.168	0.407 ± 0.054
PC ae C38:5	114	Phosphatidylcholine acyl-alkyl C38:5	1.298 ± 0.082	0.578 ± 0.050	1.629 ± 0.126	0.634 ± 0.082
PC ae C38:6	115	Phosphatidylcholine acyl-alkyl C38:6	3.735 ± 0.199	7.273 ± 0.556	3.514 ± 0.271	7.854 ± 0.888
PC ae C40:0	116	Phosphatidylcholine acyl-alkyl C40:0	14.60 ± 0.722	31.07 ± 2.285	13.20 ± 0.863	39.39 ± 6.448
PC ae C40:1	117	Phosphatidylcholine acyl-alkyl C40:1	20.25 ± 0.911	33.64 ± 2.16	14.03 ± 0.774	37.49 ± 4.038
PC ae C40:2	118	Phosphatidylcholine acyl-alkyl C40:2	0.683 ± 0.026	1.560 ± 0.072	0.569 ± 0.029	1.873 ± 0.171
PC ae C40:3	119	Phosphatidylcholine acyl-alkyl C40:3	0.055 ± 0.003	0.191 ± 0.013	0.064 ± 0.004	0.245 ± 0.025
PC ae C40:4	120	Phosphatidylcholine acyl-alkyl C40:4	0.234 ± 0.018	0.133 ± 0.010	0.309 ± 0.031	0.162 ± 0.019
PC ae C40:5	121	Phosphatidylcholine acyl-alkyl C40:5	0.608 ± 0.043	0.624 ± 0.044	0.668 ± 0.060	0.735 ± 0.074
PC ae C40:6	122	Phosphatidylcholine acyl-alkyl C40:6	2.218 ± 0.143	6.117 ± 0.594	1.743 ± 0.156	7.326 ± 1.305
PC ae C42:0	123	Phosphatidylcholine acyl-alkyl C42:0	0.402 ± 0.013	0.622 ± 0.037	0.400 ± 0.018	0.794 ± 0.142
PC ae C42:1	124	Phosphatidylcholine acyl-alkyl C42:1	0.289 ± 0.017	0.521 ± 0.049	0.348 ± 0.032	0.683 ± 0.143
PC ae C42:2	125	Phosphatidylcholine acyl-alkyl C42:2	0.406 ± 0.028	0.793 ± 0.066	0.504 ± 0.042	1.100 ± 0.176
PC ae C42:3	126	Phosphatidylcholine acyl-alkyl C42:3	0.992 ± 0.052	2.903 ± 0.289	0.909 ± 0.048	3.673 ± 0.511
PC ae C42:4	127	Phosphatidylcholine acyl-alkyl C42:4	0.026 ± 0.005	1.730 ± 0.144	0.024 ± 0.003	2.583 ± 0.332
PC ae C42:5	128	Phosphatidylcholine acyl-alkyl C42:5	0.390 ± 0.007	0.484 ± 0.020	0.390 ± 0.010	0.544 ± 0.042
PC ae C44:3	129	Phosphatidylcholine acyl-alkyl C44:3	0.170 ± 0.012	0.247 ± 0.028	0.206 ± 0.018	0.351 ± 0.074
PC ae C44:4	130	Phosphatidylcholine acyl-alkyl C44:4	0.151 ± 0.010	1.965 ± 0.227	0.135 ± 0.006	2.989 ± 0.640
PC ae C44:5	131	Phosphatidylcholine acyl-alkyl C44:5	0.147 ± 0.013	10.32 ± 1.381	0.088 ± 0.005	14.739 ± 2.714
PC ae C44:6	132	Phosphatidylcholine acyl-alkyl C44:6	0.020 ± 0.002	0.053 ± 0.006	0.019 ± 0.001	0.073 ± 0.011
lysoPC a C14:0	133	Lysophosphatidylcholine acyl C14:0	1.009 ± 0.020	0.940 ± 0.015	0.989 ± 0.022	0.941 ± 0.022
lysoPC a C16:0	134	Lysophosphatidylcholine acyl C16:0	10.17 ± 0.545	8.479 ± 0.209	9.810 ± 0.387	8.296 ± 0.358
lysoPC a C16:1	135	Lysophosphatidylcholine acyl C16:1	0.294 ± 0.018	0.122 ± 0.007	0.313 ± 0.024	0.125 ± 0.003
lysoPC a C17:0	136	Lysophosphatidylcholine acyl C17:0	0.208 ± 0.012	0.172 ± 0.009	0.186 ± 0.009	0.150 ± 0.005
lysoPC a C18:0	137	Lysophosphatidylcholine acyl C18:0	6.411 ± 0.363	4.644 ± 0.228	5.424 ± 0.204	4.031 ± 0.214
lysoPC a C18:1	138	Lysophosphatidylcholine acyl C18:1	1.449 ± 0.065	0.860 ± 0.023	1.550 ± 0.072	0.910 ± 0.048
lysoPC a C18:2	139	Lysophosphatidylcholine acyl C18:2	3.561 ± 0.172	1.964 ± 0.058	3.650 ± 0.192	1.937 ± 0.115
lysoPC a C20:3	140	Lysophosphatidylcholine acyl C20:3	0.280 ± 0.014	0.144 ± 0.013	0.372 ± 0.016	0.166 ± 0.011
lysoPC a C20:4	141	Lysophosphatidylcholine acyl C20:4	1.598 ± 0.067	0.343 ± 0.020	1.883 ± 0.088	0.307 ± 0.014
lysoPC a C24:0	142	Lysophosphatidylcholine acyl C24:0	0.356 ± 0.007	0.394 ± 0.016	0.349 ± 0.009	0.445 ± 0.014
lysoPC a C26:0	143	Lysophosphatidylcholine acyl C26:0	0.221 ± 0.009	0.260 ± 0.015	0.209 ± 0.011	0.296 ± 0.011
lysoPC a C26:1	144	Lysophosphatidylcholine acyl C26:1	2.081 ± 0.027	2.121 ± 0.022	2.114 ± 0.020	2.134 ± 0.021
lysoPC a C28:0	145	Lysophosphatidylcholine acyl C28:0	0.205 ± 0.007	0.177 ± 0.009	0.197 ± 0.012	0.186 ± 0.007
lysoPC a C28:1	146	Lysophosphatidylcholine acyl C28:1	0.139 ± 0.008	0.121 ± 0.003	0.131 ± 0.003	0.129 ± 0.007
lysoPC a C6:0	147	Lysophosphatidylcholine acyl C6:0	0.006 ± 0.001	0.005 ± 0.001	0.007 ± 0.002	0.007 ± 0.001
Sphingolipids
			cHF	cHF+F	cHF+ROSI	cHF+F+ROSI
Abbreviation		Full biochemical name	means ± SE	means ± SE	means ± SE	means ± SE
SM (OH) C14:1	148	Hydroxysphingomyeline C14:1	0.225 ± 0.008	0.243 ± 0.017	0.190 ± 0.012	0.254 ± 0.016
SM (OH) C16:1	149	Hydroxysphingomyeline C16:1	0.391 ± 0.020	0.466 ± 0.030	0.387 ± 0.031	0.545 ± 0.069
SM (OH) C22:1	150	Hydroxysphingomyeline C22:1	0.229 ± 0.024	0.280 ± 0.025	0.234 ± 0.024	0.363 ± 0.061
SM (OH) C22:2	151	Hydroxysphingomyeline C22:2	0.099 ± 0.11	0.131 ± 0.015	0.100 ± 0.015	0.170 ± 0.035
SM (OH) C24:1	152	Hydroxysphingomyeline C24:1	0.408 ± 0.024	0.661 ± 0.045	0.287 ± 0.019	0.737 ± 0.067
SM C16:0	153	Sphingomyeline C16:0	7.508 ± 0.024	7.784 ± 0.481	7.185 ± 0.401	8.323 ± 0.480
SM C16:1	154	Sphingomyeline C16:1	0.674 ± 0.034	0.618 ± 0.031	0.572 ± 0.026	0.570 ± 0.015
SM C18:0	155	Sphingomyeline C18:0	11.08 ± 0.801	12.68 ± 0.839	12.20 ± 0.867	14.90 ± 2.079
SM C18:1	156	Sphingomyeline C18:1	1.219 ± 0.18	1.260 ± 0.089	1.207 ± 0.063	1.324 ± 0.118
SM.C20:2	157	Sphingomyeline C20:2	0.070 ± 0.016	0.026 ± 0.006	0.094 ± 0.016	0.022 ± 0.005
SM C22:3	158	Sphingomyeline C22:3	0.000 ± 0.000	0.000 ± 0.000	0.000 ± 0.000	0.000 ± 0.000
SM C24:0	159	Sphingomyeline C24:0	0.750 ± 0.084	0.761 ± 0.095	0.824 ± 0.094	1.037 ± 0.196
SM C24:1	160	Sphingomyeline C24:1	1.394 ± 0.164	1.937 ± 0.295	1.593 ± 0.238	2.747 ± 0.680
SM C26:0	161	Sphingomyeline C26:0	0.007 ± 0.002	0.014 ± 0.002	0.008 ± 0.002	0.016 ± 0.004
SM C26:1	162	Sphingomyeline C26:1	0.009 ± 0.002	0.019 ± 0.004	0.009 ± 0.003	0.020 ± 0.004
Sugars
			cHF	cHF+F	cHF+ROSI	cHF+F+ROSI
Abbreviation		Full biochemical name	means ± SE	means ± SE	means ± SE	means ± SE
H1	163	Sum of Hexose	201.00 ± 17.86	129.66 ± 16.64	190.38 ± 21.40	153.57 ± 15.99
