# Supplementary material for: Preservation of Metabolic Flexibility in Skeletal Muscle by a Combined Use of n-3 PUFA and Rosiglitazone in Dietary Obese Mice
Source: PLoS One. 2012 Aug 31;7(8):e43764. doi: 10.1371/journal.pone.0043764 (PMC3432031; doi:10.1371/journal.pone.0043764)
Supplement: Table S6 — Real-time quantitative RT-PCR analysis in skeletal muscle. At the end of the experiment, mice were killed either without any additional manipulations, that is, while offered the ‘original’ cHF-based diets (OrD), or following the ‘diet-switch protocol’ when re-fed Chow diet; see Fig. 1. Control mice maintained on Chow diet throughout the intervention and killed in ad libitum fed state were also analyzed. Data are means±SE (n = 7–8). For gene symbols, see Table S5. a Significantly different from cHF, OrD. b significantly different from cHF+F, OrD. c significantly different from cHF+ROSI, OrD. d significantly different from cHF+F+ROSI, OrD. e Significantly different from cHF, Re-fed Chow. f significantly different from cHF+F, Re-fed Chow. g significantly different from cHF+ROSI, Re-fed Chow. h significantly different from cHF+F+ROSI, Re-fed Chow (Two-way ANOVA). i significantly different from Chow (t-test). (DOC) [file pone.0043764.s007.doc]

**Table S6** Real-time quantitative RT-PCR analysis in skeletal muscle

| **Gene symbol** | **Chow** | **cHF** | | **cHF+F** | | **cHF+ROSI** | | **cHF+F+ROSI** | |
| --- | --- | --- | --- | --- | --- | --- | --- | --- | --- |
|  |  | OrD | Re-fed Chow | OrD | Re-fed Chow | OrD | Re-fed Chow | OrD | Re-fed Chow |
| *Acot1* | 0.54 ± 0.06 | 1.00 ± 0.15i | 1.00 ± 0.09i | 1.28 ± 0.14i | 0.66 ± 0.05b | 1.12 ± 0.10i | 0.73 ± 0.05ci | 1.34 ± 0.11i | 0.66 ± 0.08d |
| *CD36* | 0.97 ± 0.08 | 1.00 ± 0.11d | 1.19 ± 0.07 | 1.30 ± 0.10i | 1.07 ± 0.06 | 1.19 ± 0.16 | 1.12 ± 0.07 | 1.51 ± 0.08i | 1.17 ± 0.10d |
| *Cpt1a* | 1.49 ± 0.31 | 1.00 ± 0.19 | 1.72 ± 0.37a | 1.36 ± 0.22 | 1.37 ± 0.19 | 1.15 ± 0.28 | 1.15 ± 0.12 | 1.61 ± 0.15 | 1.86 ± 0.30 |
| *Cpt1b* | 0.69 ± 0.35 | 1.00 ± 0.13 | 2.18 ± 0.53a | 0.69 ± 0.14 | 1.93 ± 0.30bi | 1.05 ± 0.17 | 1.65 ± 0.29 | 1.30 ± 0.18 | 1.48 ± 0.41 |
| *Cyp1a1* | 0.92 ± 0.08 | 1.00 ± 0.03d | 0.86 ± 0.05h | 1.10 ± 0.07d | 0.97 ± 0.05h | 1.18 ± 0.08d | 0.91 ± 0.041h | 1.41 ± 0.08i | 1.21 ± 0.06di |
| *Fbp2* | 0.52 ± 0.11 | 1.00 ± 0.06i | 0.89 ± 0.11 | 0.88 ± 0.13 | 0.85 ± 0.11 | 0.90 ± 0.10i | 0.55 ± 0.10c | 1.27 ± 0.06i | 0.76 ± 0.11d |
| *Glut4* | 1.68 ± 0.18 | 1.00 ± 0.13i | 1.48 ± 0.14a | 0.98 ± 0.08i | 1.43 ± 0.08b | 1.01 ± 0.09i | 1.33 ± 0.11c | 1.22 ± 0.12i | 1.59 ± 0.11d |
| *Gpd1* | 1.05 ± 0.09 | 1.00 ± 0.07 | 0.85 ± 0.06 | 0.84 ± 0.06d | 0.97 ± 0.07 | 0.86 ± 0.10 | 0.90 ± 0.05 | 1.11 ± 0.05b | 1.05 ± 0.07 |
| *Myh6* | 0.33 ± 0.09 | 1.00 ± 0.26 | 2.09 ± 0.33i | 1.21 ± 0.54 | 1.48 ± 0.47i | 1.25 ± 0.59 | 1.74 ± 0.55i | 2.19 ± 0.46i | 0.93 ± 0.31 |
| *Myh7* | 0.68 ± 0.11 | 1.00 ± 0.42 | 2.23 ± 0.26ai | 1.05 ± 0.31 | 1.65 ± 0.36i | 1.45 ± 0.60 | 1.47 ± 0.29i | 1.81 ± 0.47i | 1.30 ± 0.31 |
| *Myl2* | 1.17 ± 0.28 | 1.00 ± 0.23 | 1.93 ± 0.17ai | 1.01 ± 0.19 | 2.44 ± 0.22bi | 1.42 ± 0.31 | 2.46 ± 0.31ci | 1.23 ± 0.20 | 1.43 ± 0.34dfg |
| *Pdk4* | 0.41 ± 0.05 | 1.00 ± 0.13i | 0.84 ± 0.13 | 1.29 ± 0.16i | 0.53 ± 0.12b | 1.03 ± 0.21 | 0.52 ± 0.06c | 1.41 ± 0.16i | 0.49 ± 0.04d |
| *Pgc1a* | 0.81 ± 0.33 | 1.00 ± 0.19 | 0.91 ± 0.19 | 1.14 ± 0.33 | 1.30 ± 0.32 | 2.17 ± 0.72 | 0.82 ± 0.11c | 1.40 ± 0.35 | 0.81 ± 0.20 |
| *Scd1* | 1.55 ± 0.30 | 1.00 ± 0.09 | 1.15 ± 0.14 | 0.59 ± 0.08ci | 0.64 ± 0.08i | 1.52 ± 0.32d | 1.02 ± 0.07c | 0.75 ± 0.11i | 0.73 ± 0.15i |
| *Srebp1* | 2.79 ± 0.43 | 1.00 ± 0.12i | 1.70 ± 0.35ai | 0.85 ± 0.11i | 1.35 ± 0.21i | 1.10 ± 0.16 | 2.09 ± 0.29c | 1.24 ± 0.18 | 1.38 ± 0.18i |
| *Tnnc1* | 0.23 ± 0.07 | 1.00 ± 0.28 | 1.15 ± 0.16i | 1.12 ± 0.33 | 0.97 ± 0.19i | 1.27 ± 0.32 | 1.42 ± 0.42 | 1.73 ± 0.34i | 0.74 ± 0.15d |
| *Trib3* | 1.51 ± 0.14 | 1.00 ± 0.08i | 1.06 ± 0.11i | 1.09 ± 0.07i | 1.81 ± 0.24be | 0.98 ± 0.05i | 1.41 ± 0.06c | 1.56 ± 0.09ac | 2.09 ± 0.15degi |
| *Ucp3* | 0.88 ± 0.23 | 1.00 ± 0.12 | 1.21 ± 0.31 | 1.02 ± 0.10 | 1.00 ± 0.17 | 0.98 ± 0.21 | 0.81 ± 0.12 | 1.14 ± 0.10 | 1.45 ± 0.17 |

At the end of the experiment, mice were killed either without any additional manipulations, that is, while offered the 'original' cHF-based diets (OrD), or following the 'diet-switch protocol' when re-fed Chow diet; see Fig. 1. Control mice maintained on Chow diet throughout the intervention and killed in ad libitum fed state were also analyzed. Data are means±SE (*n*=7–8). For gene symbols, see Table S5.

a Significantly different from cHF, OrD.

b significantly different from cHF+F, OrD.

c significantly different from cHF+ROSI, OrD.

d significantly different from cHF+F+ROSI, OrD.

e Significantly different from cHF, Re-fed Chow.

f significantly different from cHF+F, Re-fed Chow.

g significantly different from cHF+ROSI, Re-fed Chow.

h significantly different from cHF+F+ROSI, Re-fed Chow (Two-way ANOVA).

i significantly different from Chow (t-test).
